# Supplementary material
Source: PubMed Central journal article supplement (PMC9516323)
Supplement: jama-e2216464-s003.pdf [file jama-e2216464-s003.pdf]

\*First name, last name, and suffix (if applicable) are required and will appear in PubMed.

| <b>*Group Name(s): ASTRUM-005 Study Group</b> |                   |                              |                  |                                                                    |                                          |                                                         |                                                                                            |
|-----------------------------------------------|-------------------|------------------------------|------------------|--------------------------------------------------------------------|------------------------------------------|---------------------------------------------------------|--------------------------------------------------------------------------------------------|
| <b>*First Name and Middle Initial(s)</b>      | <b>*Last Name</b> | <b>*Suffix (eg, Jr, III)</b> | Academic Degrees | Institution                                                        | Location (city, state/province, country) | Role or Contribution, eg, chair, principal investigator | Group (if more than 1 Group listed in the byline) and/or Subgroup (eg, Steering Committee) |
| Xiubao                                        | Ren               |                              | MD               | Tianjin Medical University Cancer Institute & Hospital             | Tianjin, China                           | Principal investigator                                  |                                                                                            |
| Vladimer                                      | Kuchava           |                              | MD, PhD          | LTD Institute of Clinical Oncology                                 | Tbilisi, Georgia                         | Principal investigator                                  |                                                                                            |
| Guoping                                       | Sun               |                              | PhD              | The First Affiliated Hospital of Anhui Medical University          | Hefei, China                             | Principal investigator                                  |                                                                                            |
| Gaofeng                                       | Li                |                              | MMed             | Yunnan Tumor Hospital                                              | Kunming, China                           | Principal investigator                                  |                                                                                            |
| Wen                                           | Lin               |                              | MMed             | Cancer Hospital of Shantou University Medical College              | Shantou, China                           | Principal investigator                                  |                                                                                            |
| Tao                                           | Zhang             |                              | MD               | The First Affiliated Hospital of Chongqing Medical University      | Chongqing, China                         | Principal investigator                                  |                                                                                            |
| Hakan                                         | Harputluoglu      |                              | MD               | Inonu University Turgut Ozal Medical Center                        | Malatya, Turkey                          | Principal investigator                                  |                                                                                            |
| Irfan                                         | Cicin             |                              | MD               | Trakya University Medical Faculty                                  | Edirne, Turkey                           | Principal investigator                                  |                                                                                            |
| Guosheng                                      | Feng              |                              | MMed             | The People's Hospital of Guangxi Zhuang Autonomous Region          | Nanning, China                           | Principal investigator                                  |                                                                                            |
| Yanrong                                       | Hao               |                              | MD               | The People's Hospital of Guangxi Zhuang Autonomous Region          | Nanning, China                           | Principal investigator                                  |                                                                                            |
| Kejing                                        | Ying              |                              | MD               | Sir Run Run Shaw Hospital, School of Medicine, Zhejiang University | Hangzhou, China                          | Principal investigator                                  |                                                                                            |
| Ping                                          | Sun               |                              | PhD              | Yantai Yuhuangding Hospital                                        | Yantai, China                            | Principal investigator                                  |                                                                                            |
| Aihong                                        | Zhong             |                              | BS               | Fuzhou Pulmonary Hospital of Fujian                                | Fuzhou, China                            | Principal investigator                                  |                                                                                            |
| Guangyu                                       | An                |                              | MD               | Beijing Chao-Yang Hospital, Capital Medical University             | Beijing, China                           | Principal investigator                                  |                                                                                            |
| Yan                                           | Wang              |                              | PhD              | General Hospital of Ningxia Medical University                     | Yinchuan, China                          | Principal investigator                                  |                                                                                            |
| Chun                                          | Chen              |                              | PhD              | Fujian Medical University Union Hospital                           | Fuzhou, China                            | Principal investigator                                  |                                                                                            |
| Sheng                                         | Yang              |                              | MMed             | Fujian Medical University Union Hospital                           | Fuzhou, China                            | Principal investigator                                  |                                                                                            |
| Zhendong                                      | Chen              |                              | MMed             | The Second Affiliated Hospital of Anhui Medical University         | Hefei, China                             | Principal investigator                                  |                                                                                            |
| Konstantin                                    | Penkov            |                              | MD               | PMI "Evromedservice"                                               | Saint Petersburg, Russia                 | Principal investigator                                  |                                                                                            |

## Supplemental Online Content: Nonauthor Collaborators

\*First name, last name, and suffix (if applicable) are required and will appear in PubMed.

| *First Name and Middle Initial(s) | *Last Name | *Suffix (eg, Jr, III) | Academic Degrees | Institution                                                              | Location (city, state/province, country) | Role or Contribution, eg, chair, principal investigator | Group (if more than 1 Group listed in the byline) and/or Subgroup (eg, Steering Committee) |
|-----------------------------------|------------|-----------------------|------------------|--------------------------------------------------------------------------|------------------------------------------|---------------------------------------------------------|--------------------------------------------------------------------------------------------|
| Yuriy                             | Semegen    |                       | MD               | Municipal Non-profit Enterprise "Bukovinian Clinical Oncology Center"    | Chernivtsi, Ukraine                      | Principal investigator                                  |                                                                                            |
| Oleg                              | Kobziev    |                       | MD               | Municipal Non-profit Enterprise "Regional Center of Oncology"            | Kharkiv, Ukraine                         | Principal investigator                                  |                                                                                            |
| Feng                              | Luo        |                       | MD               | West China Hospital of Sichuan University                                | Chengdu, China                           | Principal investigator                                  |                                                                                            |
| Peiguo                            | Cao        |                       | PhD              | The Third Xiangya Hospital of Central South University                   | Changsha, China                          | Principal investigator                                  |                                                                                            |
| Zhixiong                          | Yang       |                       | BS               | Affiliated Hospital of Guangdong Medical University                      | Zhanjing, China                          | Principal investigator                                  |                                                                                            |
| Min                               | Fan        |                       | PhD              | Fudan University Shanghai Cancer Center                                  | Shanghai, China                          | Principal investigator                                  |                                                                                            |
| Wen                               | Li         |                       | PhD              | The Second Affiliated Hospital of Zhejiang University School of Medicine | Hangzhou, China                          | Principal investigator                                  |                                                                                            |
| Robert                            | Mroz       |                       | MD               | University Clinical Hospital in Bialystok                                | Bialystok, Poland                        | Principal investigator                                  |                                                                                            |
| Andrey                            | Akopov     |                       | MD               | First Saint-Petersburg State Medical University n.a. I.P. Pavlov         | Saint Petersburg, Russia                 | Principal investigator                                  |                                                                                            |
| Tuncay                            | Goksel     |                       | MD               | Ege University Medical Faculty                                           | Izmir, Turkey                            | Principal investigator                                  |                                                                                            |
| Mahmut                            | Gumus      |                       | MD               | Istanbul Medeniyet University Goztepe Training and Research              | Istanbul, Turkey                         | Principal investigator                                  |                                                                                            |
| Wenlei                            | Zhuo       |                       | MD               | The Second Affiliated Hospital of Army Medical University, PLA           | Chongqing, China                         | Principal investigator                                  |                                                                                            |
| Jian                              | Fang       |                       | BS               | Beijing Cancer Hospital                                                  | Beijing, China                           | Principal investigator                                  |                                                                                            |
| Hui                               | Zhao       |                       | MMed             | The Second Hospital of Anhui Medical University                          | Hefei, China                             | Principal investigator                                  |                                                                                            |
| Zhong                             | Lin        |                       | BS               | The Fifth Affiliated Hospital Sun Yat-Sen University                     | Zhuhai, China                            | Principal investigator                                  |                                                                                            |
| Yanping                           | Hu         |                       | MMed             | Hubei Cancer Hospital                                                    | Wuhan, China                             | Principal investigator                                  |                                                                                            |
| Yarong                            | Li         |                       | PhD              | The Second Hospital of Jilin University                                  | Changchun, China                         | Principal investigator                                  |                                                                                            |
| Shuqun                            | Zhang      |                       | PhD              | The Second Affiliated Hospital of Xi'an Jiaotong University              | Xi'an, China                             | Principal investigator                                  |                                                                                            |

## Supplemental Online Content: Nonauthor Collaborators

\*First name, last name, and suffix (if applicable) are required and will appear in PubMed.

| *First Name and Middle Initial(s) | *Last Name  | *Suffix (eg, Jr, III) | Academic Degrees | Institution                                                                                            | Location (city, state/province, country) | Role or Contribution, eg, chair, principal investigator | Group (if more than 1 Group listed in the byline) and/or Subgroup (eg, Steering Committee) |
|-----------------------------------|-------------|-----------------------|------------------|--------------------------------------------------------------------------------------------------------|------------------------------------------|---------------------------------------------------------|--------------------------------------------------------------------------------------------|
| Jiuwei                            | Cui         |                       | MD               | The First Hospital of Jilin University                                                                 | Changchun, China                         | Principal investigator                                  |                                                                                            |
| Nadezhda                          | Kovalenko   |                       | PhD              | GBUZ "Regional Clinical Oncologic Dispensary of Volgograd"                                             | Volgograd, Russia                        | Principal investigator                                  |                                                                                            |
| Cagatay                           | Arslan      |                       | MD               | Izmir Medical Park Hospital–Medical Oncology                                                           | Izmir, Turkey                            | Principal investigator                                  |                                                                                            |
| Devrim                            | Cabuk       |                       | MD               | Kocaeli University Research and Practice Hospital                                                      | Kocaeli, Turkey                          | Principal investigator                                  |                                                                                            |
| Alev                              | Türker      |                       | MD               | Hacettepe University Medical Faculty–Medical Oncology                                                  | Ankara, Turkey                           | Principal investigator                                  |                                                                                            |
| Igor                              | Bondarenko  |                       | PhD              | Municipal Non-profit Enterprise "City Clinical Hospital No. 4" of Dnipro City Council                  | Dnipro, Ukraine                          | Principal investigator                                  |                                                                                            |
| Yevhen                            | Hotko       |                       | PhD              | Uzhgorod Central City Clinical Hospital                                                                | Uzhgorod, Ukraine                        | Principal investigator                                  |                                                                                            |
| Olexandr                          | Goloborodko |                       | PhD              | Municipal Non-profit Enterprise "Zaporizhzhia Regional Antitumor Center" Zaporizhzhya Regional Council | Zaporizhzhia, Ukraine                    | Principal investigator                                  |                                                                                            |
| Dongji                            | Chen        |                       | BS               | Gansu Wuwei Tumor Hospital                                                                             | Wuwei, China                             | Principal investigator                                  |                                                                                            |
| Mengzhao                          | Wang        |                       | MD               | Peking Union Medical College Hospital                                                                  | Beijing, China                           | Principal investigator                                  |                                                                                            |
| Zhuang                            | Yu          |                       | MD               | The Affiliated Hospital of Qingdao University                                                          | Qingdao, China                           | Principal investigator                                  |                                                                                            |
| Junguo                            | Lu          |                       | BS               | Nantong Tumor Hospital                                                                                 | Nantong, China                           | Principal investigator                                  |                                                                                            |
| Liyan                             | Jiang       |                       | MD, PhD          | Shanghai Chest Hospital                                                                                | Shanghai, China                          | Principal investigator                                  |                                                                                            |
| Hao                               | Xiong       |                       | BMed             | The Second People's Hospital of Yibin                                                                  | Yibin, China                             | Principal investigator                                  |                                                                                            |
| Davit                             | Giorgadze   |                       | MD, PhD          | LTD New Hospitals                                                                                      | Tbilisi, Georgia                         | Principal investigator                                  |                                                                                            |
| Sergey                            | Orlov       |                       | MD               | LLC–Strategic Medical Systems                                                                          | Saint Petersburg, Russia                 | Principal investigator                                  |                                                                                            |
| Ahmet                             | Bilici      |                       | MD               | Medipol Mega Hospital–Medical Oncology                                                                 | Istanbul, Turkey                         | Principal investigator                                  |                                                                                            |
| Ivan                              | Sinelnikov  |                       | MD               | Municipal Enterprise "Volyn Regional Medical Center of Oncology" Volyn Regional Council                | Lutsk, Ukraine                           | Principal investigator                                  |                                                                                            |

## Supplemental Online Content: Nonauthor Collaborators

\*First name, last name, and suffix (if applicable) are required and will appear in PubMed.

| *First Name and Middle Initial(s) | *Last Name    | *Suffix (eg, Jr, III) | Academic Degrees | Institution                                                                                               | Location (city, state/province, country)                       | Role or Contribution, eg, chair, principal investigator | Group (if more than 1 Group listed in the byline) and/or Subgroup (eg, Steering Committee) |
|-----------------------------------|---------------|-----------------------|------------------|-----------------------------------------------------------------------------------------------------------|----------------------------------------------------------------|---------------------------------------------------------|--------------------------------------------------------------------------------------------|
| Gongyan                           | Chen          |                       | MD               | Harbin Medical University Cancer Hospital                                                                 | Harbin, China                                                  | Principal investigator                                  |                                                                                            |
| Lu                                | Yue           |                       | MD               | Qingdao Municipal Hospital                                                                                | Qingdao, China                                                 | Principal investigator                                  |                                                                                            |
| Xiaoli                            | Zhu           |                       | MD               | Zhongda Hospital Southeast University                                                                     | Nanjing, China                                                 | Principal investigator                                  |                                                                                            |
| Liqin                             | Lu            |                       | BMed             | Zhejiang Provincial People's Hospital                                                                     | Hangzhou, China                                                | Principal investigator                                  |                                                                                            |
| Mariam                            | Zhvania       |                       | MD               | "TIM-Tbilisi Institute of Medicine" LTD                                                                   | Tbilisi, Georgia                                               | Principal investigator                                  |                                                                                            |
| Malgorzata                        | Ulanska       |                       | MD               | Voivodeship Multi-specialist Center for Oncology and Traumatology M. Copernicus in Lodz                   | Lodz, Poland                                                   | Principal investigator                                  |                                                                                            |
| Igor                              | Lifirenko     |                       | MD               | RBIH "Kursk Regional Clinical Oncology Dispensary" of Kursk Region Healthcare Committee                   | Kislino village, Ryshkovsky Selsoviet Rural Settlement, Russia | Principal investigator                                  |                                                                                            |
| Timur                             | Andabekov     |                       | MD               | Limited Liability Company "AV Medical Group"—Oncology                                                     | Saint Petersburg, Russia                                       | Principal investigator                                  |                                                                                            |
| Maria                             | Smagina       |                       | MD               | Leningrad Regional Clinical Hospital                                                                      | Saint Petersburg, Russia                                       | Principal investigator                                  |                                                                                            |
| Fedor                             | Moiseenko     |                       | MD               | Saint-Petersburg Clinical Scientific and Practical Center of Specialized Types of Medical Care (Oncology) | Saint Petersburg, Russia                                       | Principal investigator                                  |                                                                                            |
| Yuksel                            | Urun          |                       | MD               | Ankara University Medical Faculty—Oncology                                                                | Ankara, Turkey                                                 | Principal investigator                                  |                                                                                            |
| Ligong                            | Nie           |                       | MMed             | Peking University First Hospital                                                                          | Beijing, China                                                 | Principal investigator                                  |                                                                                            |
| Bangwei                           | Cao           |                       | MD               | Beijing Friendship Hospital, Capital Medical University                                                   | Beijing, China                                                 | Principal investigator                                  |                                                                                            |
| Zhenyu                            | You           |                       | PhD              | The First Affiliated Hospital of Nanchang University                                                      | Nanchang, China                                                | Principal investigator                                  |                                                                                            |
| Haixin                            | Huang         |                       | MMed             | Liuzhou Worker's Hospital                                                                                 | Liuzhou, China                                                 | Principal investigator                                  |                                                                                            |
| Shenpeng                          | Ying          |                       | MD               | Taizhou Central Hospital                                                                                  | Taizhou, China                                                 | Principal investigator                                  |                                                                                            |
| Alexandre                         | Tavartkiladze |                       | MD, PhD          | Institute for Personalized Medicine LTD                                                                   | Tbilisi, Georgia                                               | Principal investigator                                  |                                                                                            |
| Tariel                            | Kitiashvili   |                       | MD               | JSC Evex Clinics, St. Nikolozhi Medical Center                                                            | Kutaisi, Georgia                                               | Principal investigator                                  |                                                                                            |

## Supplemental Online Content: Nonauthor Collaborators

\*First name, last name, and suffix (if applicable) are required and will appear in PubMed.

| *First Name and Middle Initial(s) | *Last Name   | *Suffix (eg, Jr, III) | Academic Degrees | Institution                                                                                        | Location (city, state/province, country) | Role or Contribution, eg, chair, principal investigator | Group (if more than 1 Group listed in the byline) and/or Subgroup (eg, Steering Committee) |
|-----------------------------------|--------------|-----------------------|------------------|----------------------------------------------------------------------------------------------------|------------------------------------------|---------------------------------------------------------|--------------------------------------------------------------------------------------------|
| Amiran                            | Matitashvili |                       | MD               | “Scientific Research Center of Oncology” LTD                                                       | Tbilisi, Georgia                         | Principal investigator                                  |                                                                                            |
| Tsira                             | Kortua       |                       | MD               | Multiprofile Clinic Consilium Medula LTD                                                           | Tbilisi, Georgia                         | Principal investigator                                  |                                                                                            |
| Eugeny                            | Kulikov      |                       | MD               | Ryazan State Medical University n.a. I.P. Pavlov                                                   | Ryazan, Russia                           | Principal investigator                                  |                                                                                            |
| Sergey                            | Cheporov     |                       | MD               | State Budgetary Healthcare Institution of Yaroslavl Region                                         | Yaroslavl, Russia                        | Principal investigator                                  |                                                                                            |
| Vadim                             | Shirinkin    |                       | MD               | State Budgetary Healthcare Institution “Orenburg Regional Clinical Oncology Dispensary”            | Orenburg, Russia                         | Principal investigator                                  |                                                                                            |
| Mustafa                           | Ozgurolu     |                       | MD               | Istanbul University Cerrahpasa Medical Faculty                                                     | Istanbul, Turkey                         | Principal investigator                                  |                                                                                            |
| Mehmet                            | Artac        |                       | MD               | Necmettin Erbakan University Meram Medical Faculty–Oncology                                        | Konya, Turkey                            | Principal investigator                                  |                                                                                            |
| Oleksii                           | Kolesnik     |                       | PhD              | Medical Center of the Limited Liability Company “Onkolaif”                                         | Zaporizhzhia, Ukraine                    | Principal investigator                                  |                                                                                            |
| Andrii                            | Gardashnikov |                       | MD               | Municipal Non-profit Enterprise “Regional Clinical Oncology Center of Kirovohrad Regional Council” | Kropyvnytskyi, Ukraine                   | Principal investigator                                  |                                                                                            |
| Denys                             | Pominchuk    |                       | MD               | Medical Center of the Limited Liability Company “Medical Center Verum”                             | Kyiv, Ukraine                            | Principal investigator                                  |                                                                                            |
