# Supplementary material
Source: PubMed Central journal article supplement (PMC9516323)
Supplement: jama-e2216464-s004.pdf [file jama-e2216464-s004.pdf]

## Data Sharing Statement

Cheng. Effect of First-Line Serplulimab vs Placebo Added to Chemotherapy on Survival in Patients With Extensive-Stage Small Cell Lung Cancer. *JAMA*. Published September 27, 2022. doi:10.1001/jama.2022.16464

### Data

**Data available:** No

### Additional Information

**Explanation for why data not available:** The data generated in this study are available from the corresponding author upon reasonable request.
